# Supplementary material for: The persistence of low-grade inflammatory monocytes contributes to aggravated atherosclerosis
Source: PubMed Central journal article supplement (PMC5105176; doi:10.1038/ncomms13436), 2016-11-08
Supplement: ncomms13436-s1.pdf [file ncomms13436-s1.pdf]

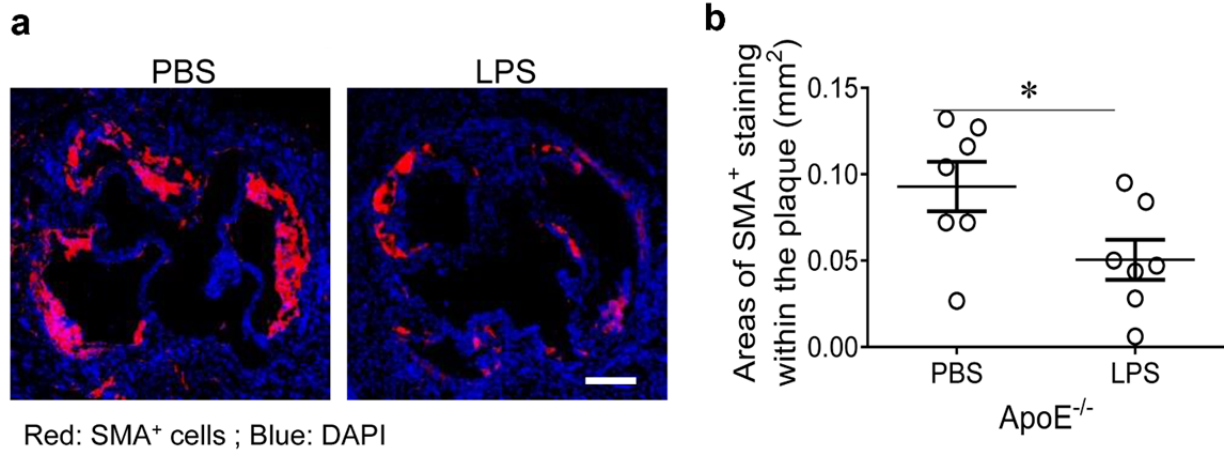

1  
2  
3  
4  
5  
6  
7  
8  
9  
10  
11  
12  
13  
14

**Supplementary Fig 1. Subclinical endotoxemia reduces plaque smooth muscle actin (SMA) levels.** ApoE<sup>-/-</sup> mice were pre-conditioned with PBS or super-low dose LPS for 4 weeks together with high fat diet, followed by high fat diet feeding only for an additional 4 weeks. **(a)** Representative images of SMA<sup>+</sup> staining within atherosclerotic plaques of aortic root areas. Scale bar: 300  $\mu$ m. **(b)** Quantification of SMA<sup>+</sup> positive staining areas per mm<sup>2</sup> in the lesion area of aortic root. Data are shown for aortic plaque areas from PBS (n = 7) and super-low dose LPS conditioned (n = 7) mice. Data represent two similar experiments. Error bars show means  $\pm$  s.e.m.; \* P < 0.05; student t-test.

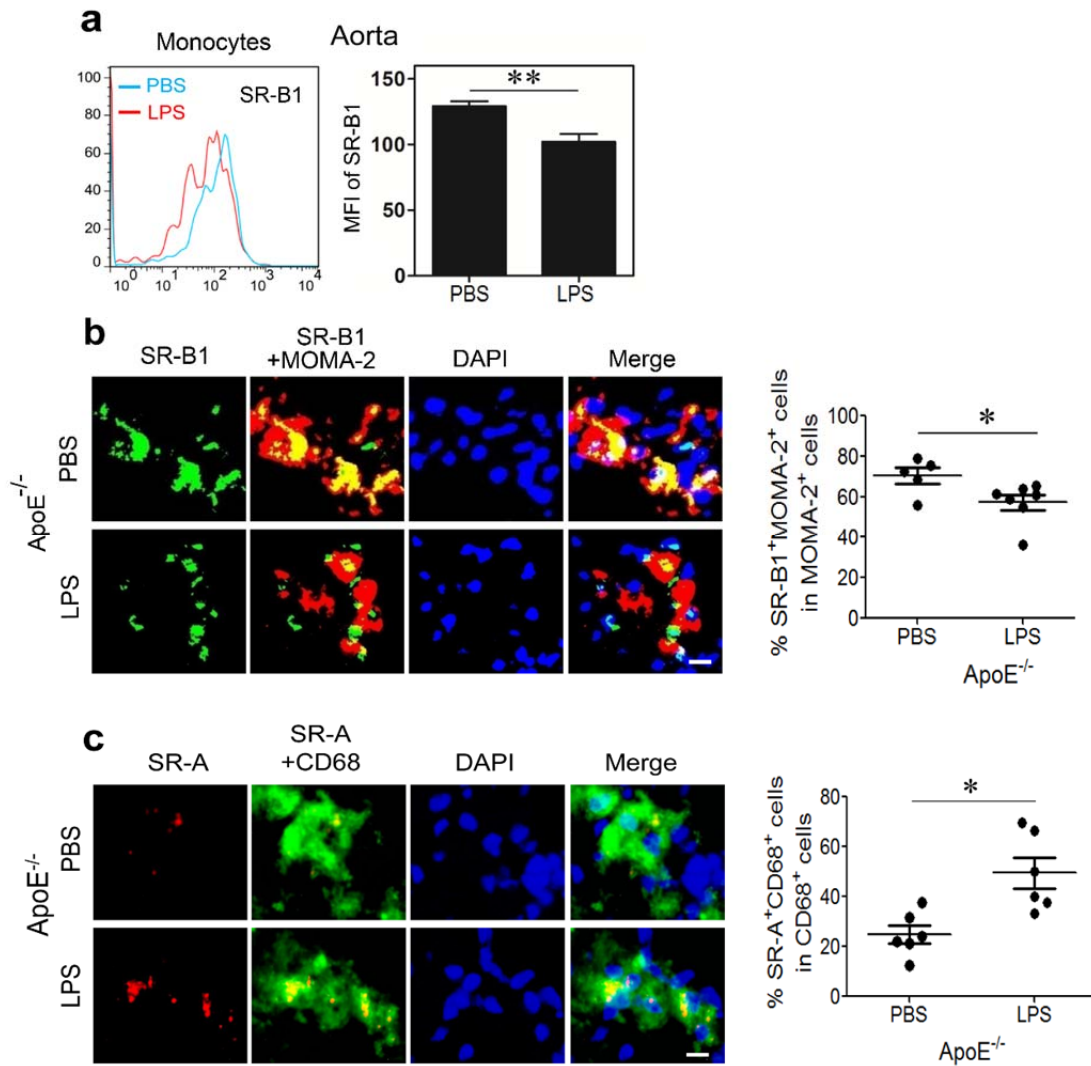

16

17 **Supplementary Fig 2. Subclinical endotoxemia increases the expression of SR-A and**  
 18 **reduces the expression of SR-B1.** *ApoE*<sup>-/-</sup> mice were pre-conditioned with PBS or super-low  
 19 dose LPS for 4 weeks together with high fat diet, followed by high fat diet feeding only for an  
 20 additional 4 weeks. (a) Single cell suspensions were prepared from aorta, and the expression  
 21 levels of SR-B1 within monocytes were also analyzed. Data are shown for aortic monocytes from  
 22 PBS (n = 6) and super-low dose LPS conditioned (n = 6) mice. (b) Representative images of SR-  
 23 B1<sup>+</sup>MOMA-2<sup>+</sup> macrophages in the atherosclerotic plaques of aortic root areas. Scale bar: 100  $\mu$ m.  
 24 Quantification of SR-B1<sup>+</sup>MOMA-2<sup>+</sup> area as a percentage of the total atherosclerotic plaque area  
 25 within the aortic root. (c) Representative images of atherosclerotic plaques within aortic root  
 26 areas after staining with anti-SR-A and anti-CD68 antibodies. Scale bar: 100  $\mu$ m. The percentage  
 27 of SRA<sup>+</sup> cells within CD68<sup>+</sup> macrophages was quantified. Data represent two similar  
 28 experiments. Error bars show means  $\pm$  s.e.m.; \* P < 0.05; \*\* P < 0.01; student t-test.

29

30

**a**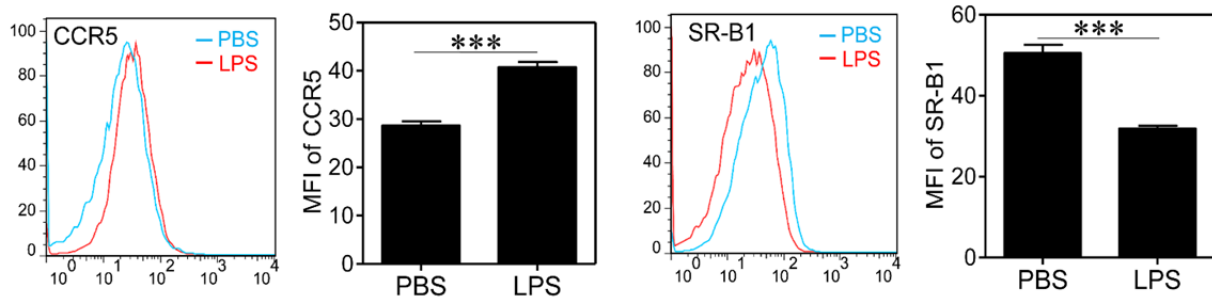**b**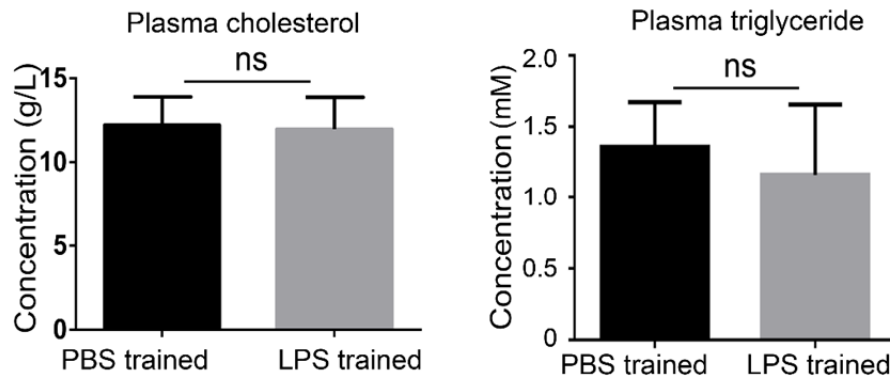**c**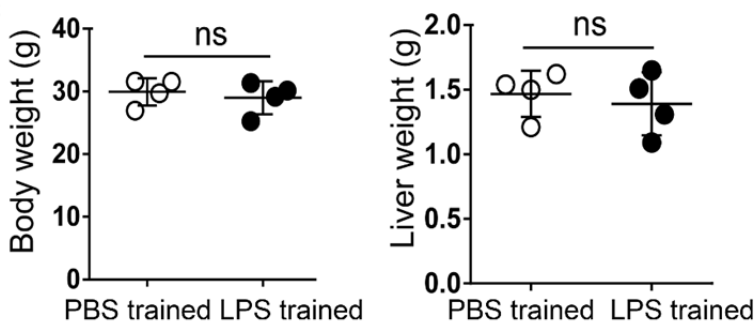**d** Liver Sr-b1 expression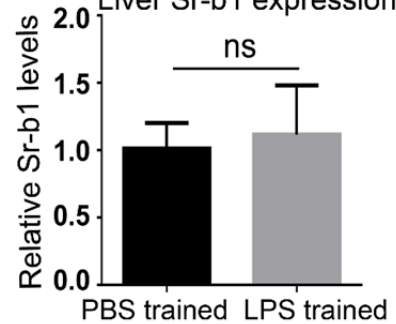

32

33

34 **Supplementary Fig 3. Adoptive transfer of monocytes programmed by super-low dose LPS**35 **does not alter plasma levels of lipids or overall body and liver weights.** BM cells from36 *ApoE*<sup>-/-</sup> mice were cultured with M-CSF (10 ng/ml) in the presence of either PBS or LPS (0.1

37 ng/ml) for 5 days. Surface expression levels of CCR5 and SR-B1 on inflammatory monocytes

38 were determined by flow cytometry. (b-c) PBS or LPS programmed (trained) BM cells were then

39 adoptively transferred through *i.v.* injection to HFD-fed *ApoE*<sup>-/-</sup> mice ( $3 \times 10^6$  cells/mouse) once

40 a week for 4 weeks. (b) Plasma levels of total cholesterol and triglyceride were measured and

41 quantified. (c) Total body weight and liver weight were quantified. (d) Liver levels of Sr-b1

42 expression were measured by real-time RT-PCR. Data represent two similar experiments. Error

43 bars represent means  $\pm$  s.e.m.; ns: no significance, \*\*\*, P < 0.001, student t-test.

44

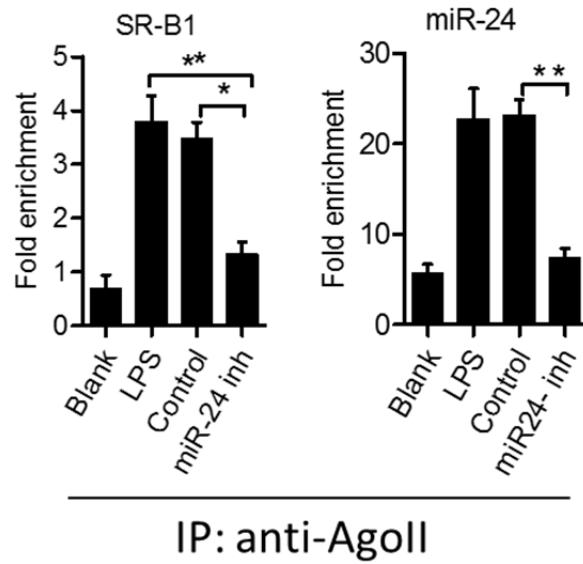

45

46

47 **Supplementary Fig 4. miR-24 forms a close complex with Sr-b1 mRNA as measured by the**  
 48 **RIP assay.** Total RNAs were harvested from LPS treated WT bone marrow macrophages ( $30 \times$   
 49  $10^6$ ) and used for co-immunoprecipitation with an anti-AgoII antibody, in the presence of either  
 50 miR-24 mimics or miR-24 antagomoir . The relative enrichment of Sr-b1 messenger RNAs were  
 51 analyzed by real-time RT-PCR. Results are presentative of three experiments and are expressed  
 52 as fold enrichment relative to AgoII-immunoprecipitation control samples.

53

54  
55  
56

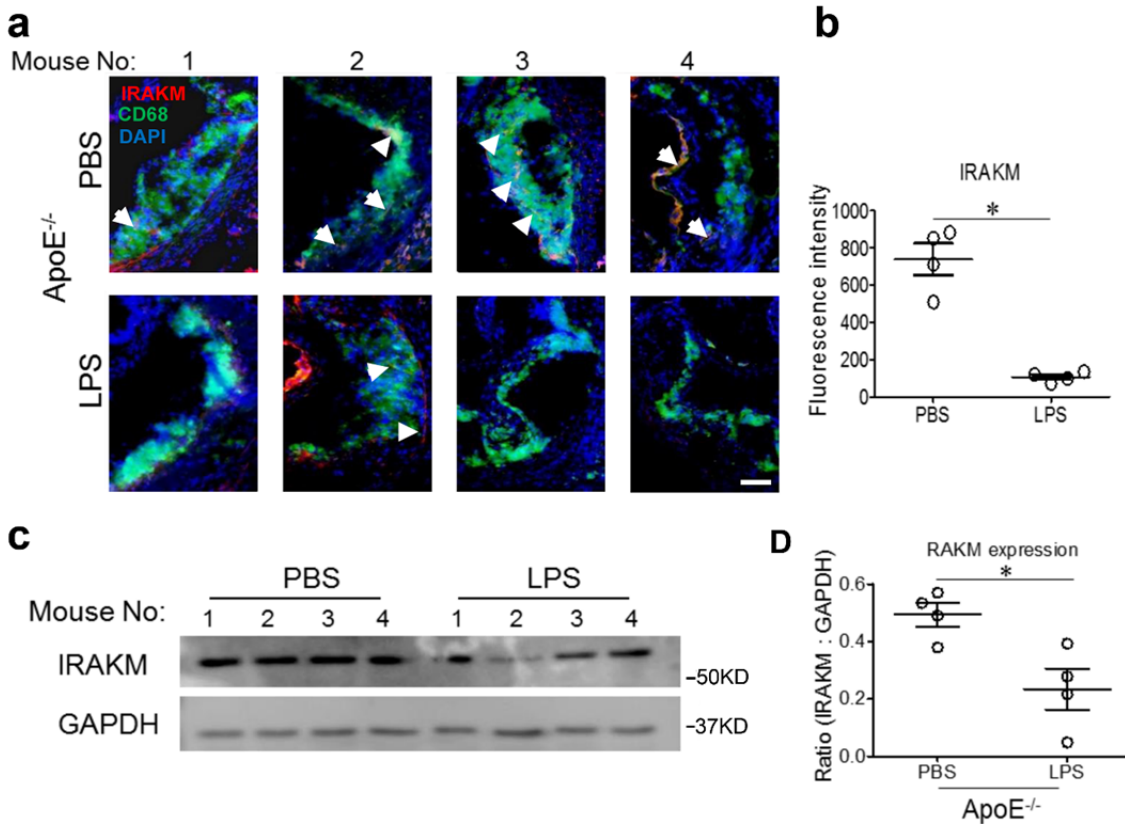

57  
58  
59

60 **Supplementary Fig 5. Reduced IRAK-M expression in mice with subclinical endotoxemia.**

61 ApoE<sup>-/-</sup> mice were pre-conditioned with PBS or super-low dose LPS for 4 weeks together with  
62 high fat diet, followed by high fat diet feeding only for an additional 4 weeks. (a) Representative  
63 images of atherosclerotic plaques within aortic root areas after staining with anti-IRAK-M and  
64 anti-CD68 antibodies. Scale bar: 100  $\mu$ m. (b) The fluorescent intensity of IRAK-M was  
65 quantified. Data are shown from PBS (n = 4) and super-low dose LPS conditioned (n = 4) mice.  
66 (c) Western blot analyses of IRAK-M expression in the splenic cells. (D) Relative expression  
67 levels of IRAK-M were quantified. Data are shown from PBS (n = 4) and super-low dose LPS  
68 conditioned (n = 4) mice. Results are presentative of two experiments. Error bars show means  $\pm$   
69 s.e.m.; \*, P < 0.05; student t-test.

70

71  
72  
73

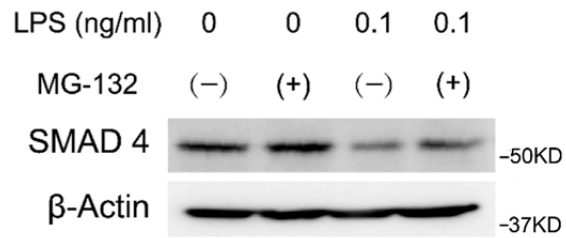

74  
75  
76  
77  
78  
79  
80  
81  
82  
83

**Supplementary Fig 6. The reduction of Smad4 in monocytes by super-low dose LPS is not caused by protein degradation.** WT BMM were cultured in the presence of absence of 100 pg/ml LPS, together with or without MG-132 (25 nM) for 5 days. The cellular levels of Smad4 were detected by Western Blot. Data represents two similar experiments.

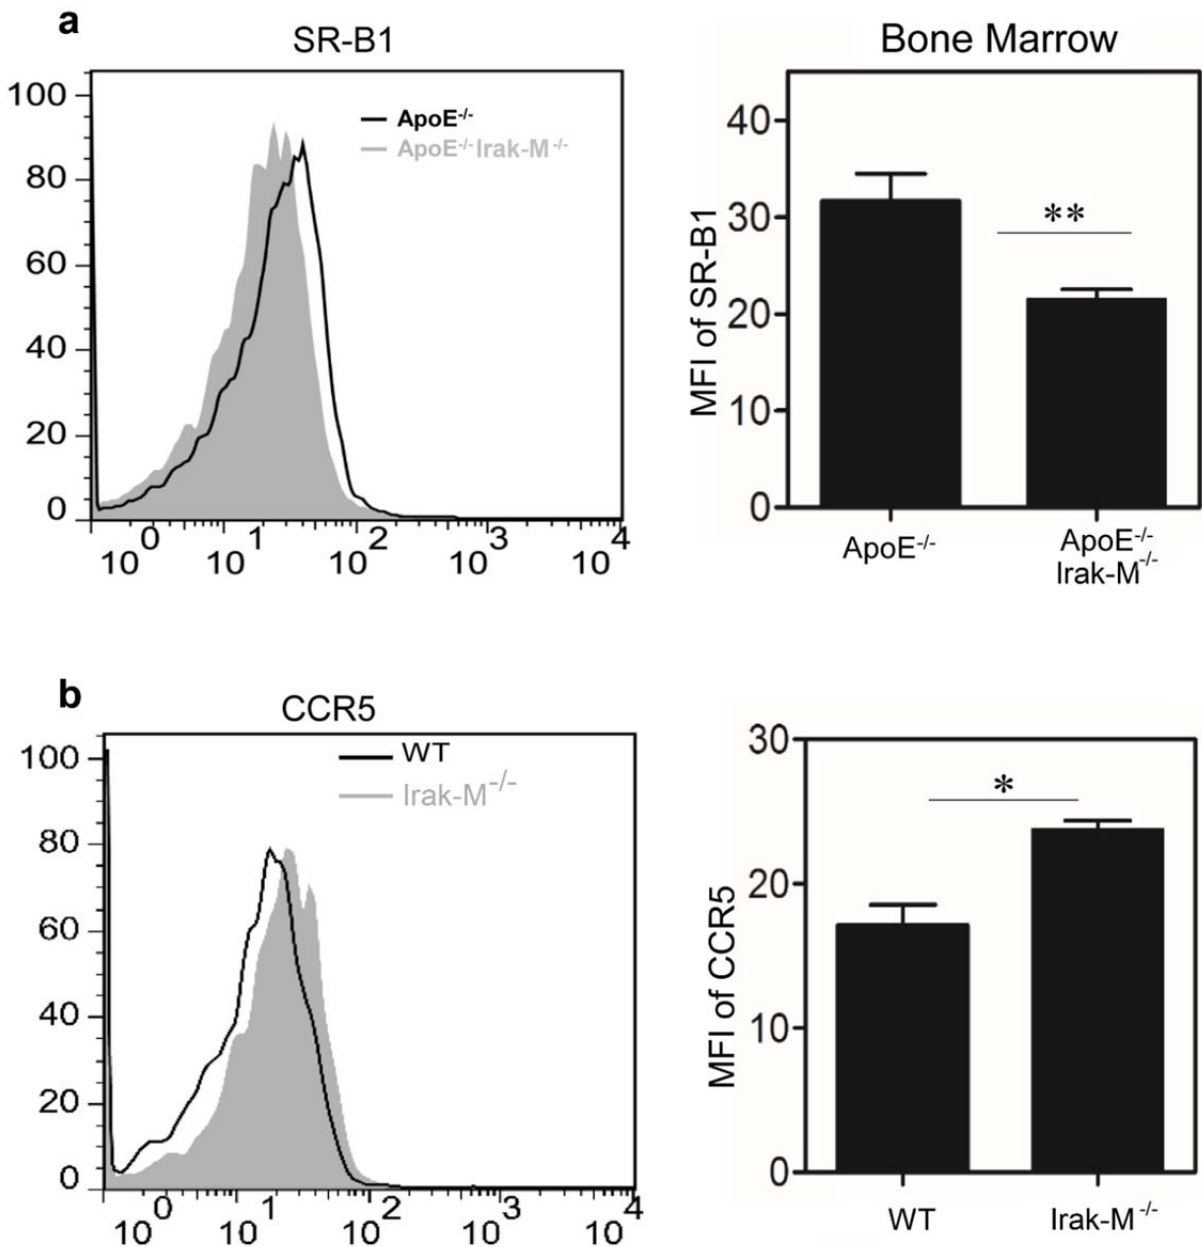

85

**Supplementary Fig 7. Disruption of IRAK-M suppresses SR-B1 and up-regulates CCR5.** (a)  $ApoE^{-/-}$  and  $ApoE^{-/-}Irak-M^{-/-}$  mice were fed with HFD for 8 weeks. The expression levels of SR-B1 within BM monocytes were compared between  $ApoE^{-/-}$  (n = 7) and  $ApoE^{-/-}Irak-M^{-/-}$  (n = 6) mice. Error bars show means  $\pm$  s.e.m.; \*\*, P < 0.01; student t-test. (b) BM cells from WT C57 BL/6 mice or  $Irak-M^{-/-}$  mice were cultured with M-CSF (10 ng/ml) in the presence of super-low dose LPS (0.1 ng/ml). On day 5, the expression levels of CCR5 within CD11b<sup>+</sup>Ly6C<sup>++</sup> monocytes were examined. Quantified data are shown from WT and  $Irak-M^{-/-}$  cells (n = 3). Results are representative of three experiments. Error bars show means  $\pm$  s.e.m.; \*, P < 0.05; student t-test.

94  
95  
96  
97

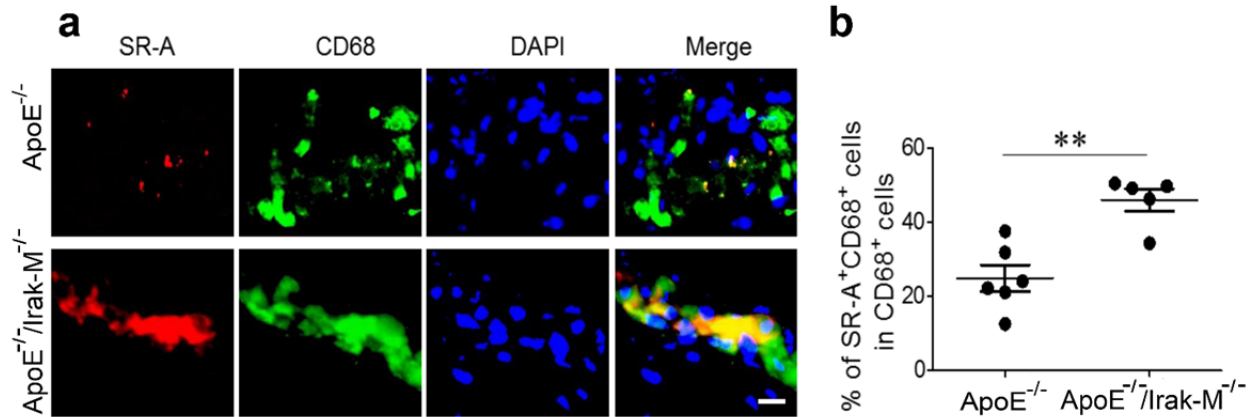

98  
99  
100  
101  
102  
103  
104  
105  
106  
107  
108

**Supplementary Fig 8. Disruption of IRAK-M increases SR-A expression of macrophages within lesion area.** *ApoE*<sup>-/-</sup> and *ApoE*<sup>-/-</sup>/*Irak-M*<sup>-/-</sup> mice were fed with HFD for 8 weeks. (a) Representative images of atherosclerotic plaques within aortic root areas after staining with anti-SRA and anti-CD68 antibodies. Scale bar: 100 μm. (b) The percentage of SRA<sup>+</sup> cells within CD68<sup>+</sup> macrophages was quantified. Data are shown from *ApoE*<sup>-/-</sup> (n = 6) and *ApoE*<sup>-/-</sup>/*Irak-M*<sup>-/-</sup> (n = 5) mice. Results are representative of two similar experiments. Error bars show means ± s.e.m.; \*\* P < 0.01; student t-test.



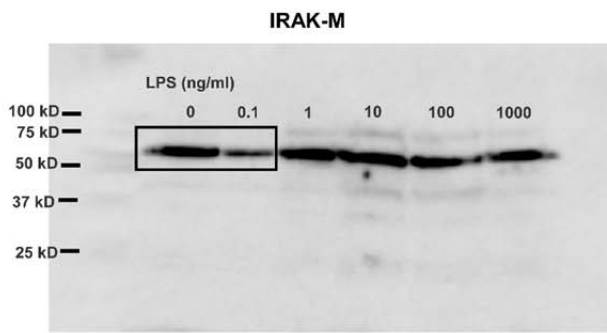

**Fig.5d**

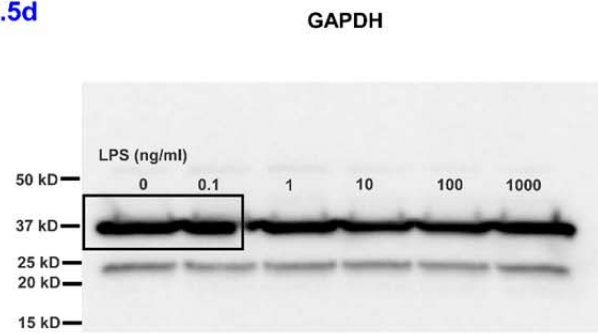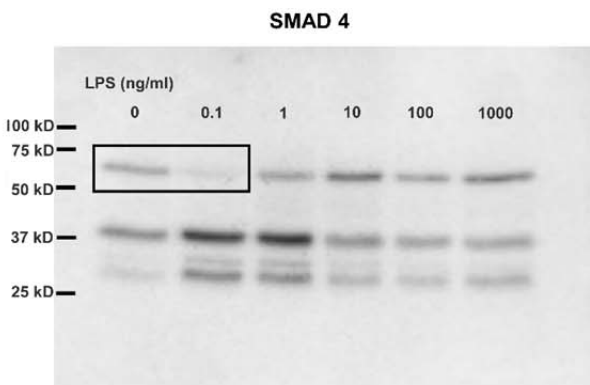

**Fig.5e**

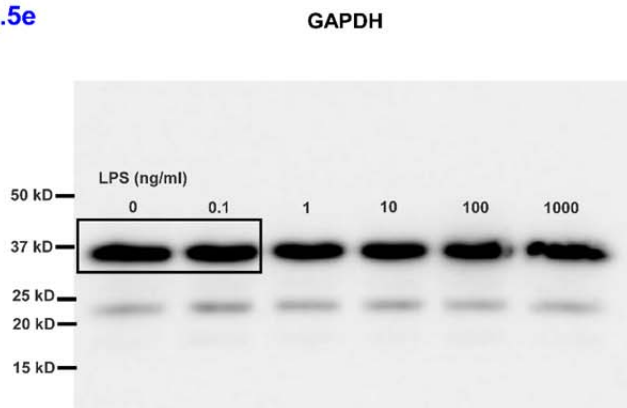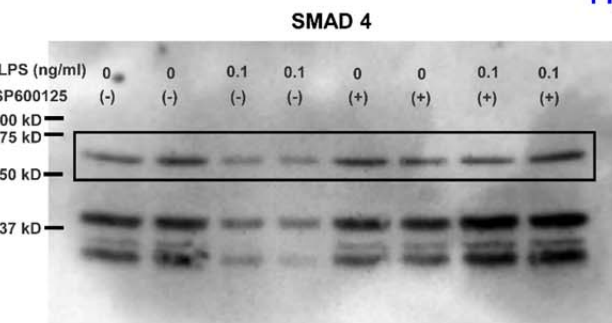

**Fig.6c**

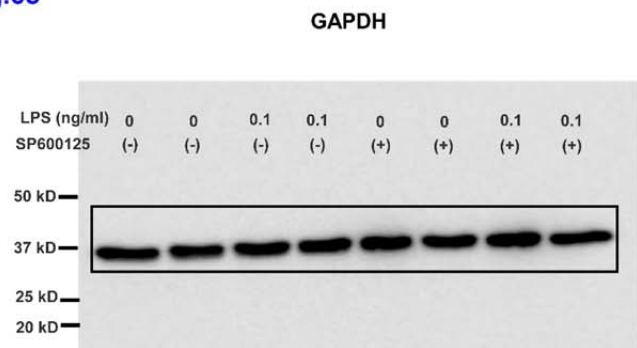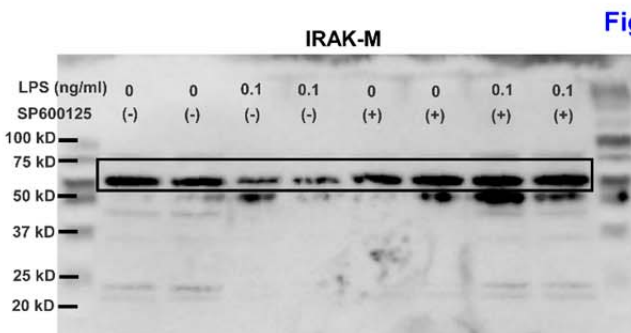

**Fig.6d**

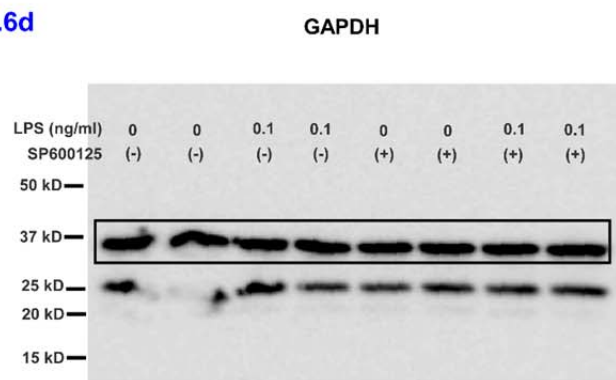

109

110 **Supplementary Fig 9. Original gels shown in the main manuscript.** Blots correspond to those  
111 shown in Figure 5d, 5e, and Figure 6c, and 6d within the main manuscript.

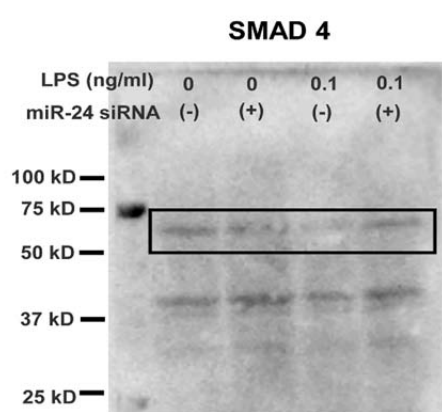

**Fig.6g**

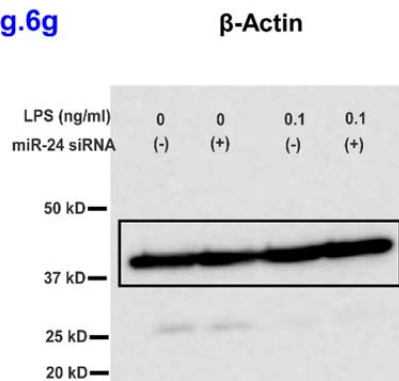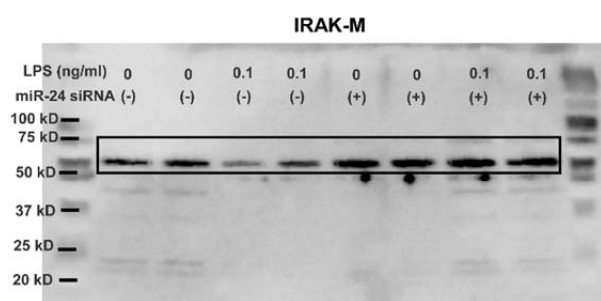

**Fig.6h**

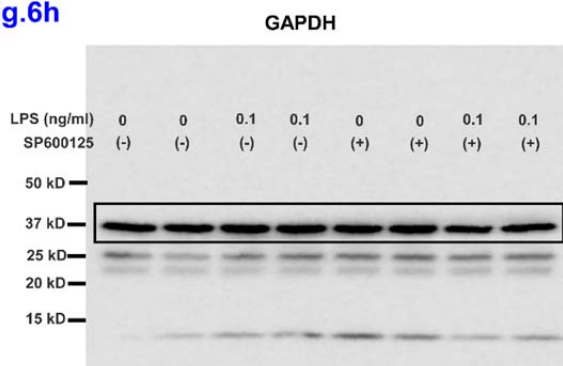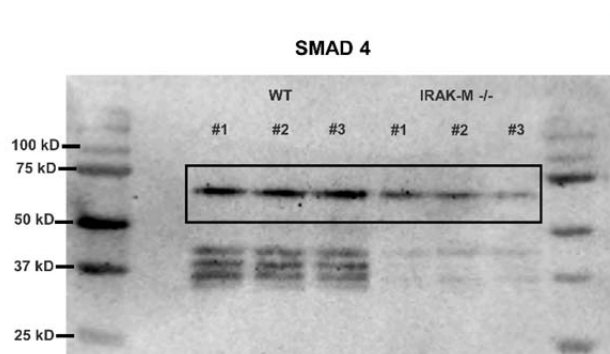

**Fig.7e**

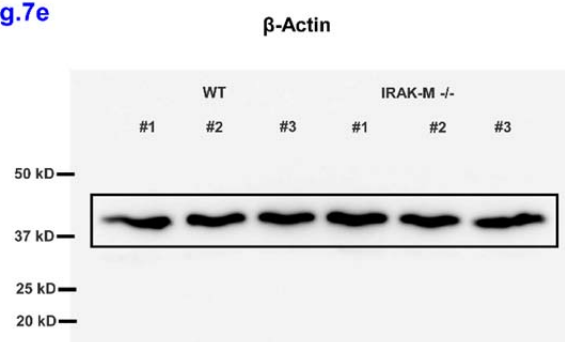

112

113

114 **Supplementary Fig 10. Uncropped original gels shown in the main manuscript.** Blots  
115 correspond to those shown in Figure 6g, 6h, and Figure 7f within the main manuscript.

116

117

Supplementary Fig. 5 c

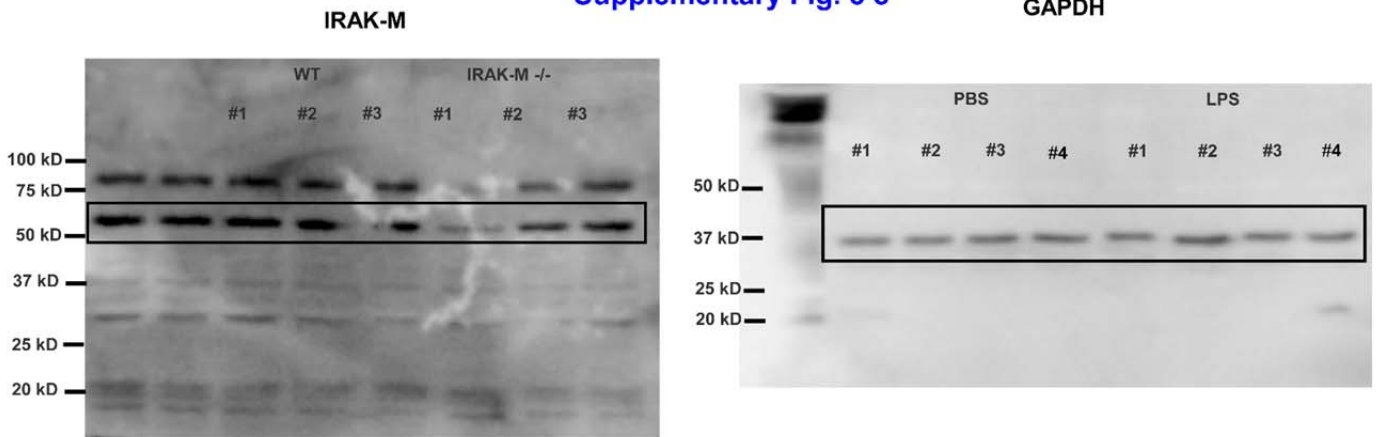

Supplementary Fig. 6

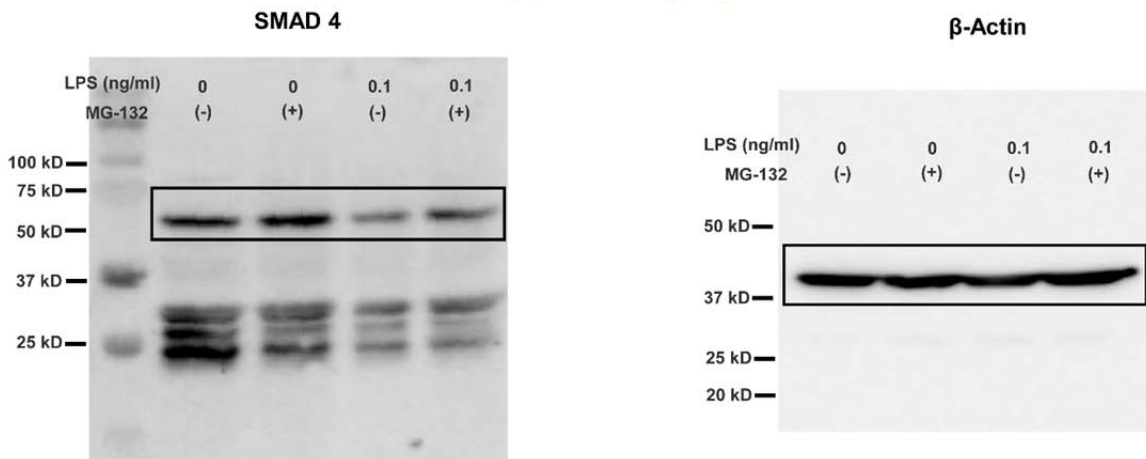

11  
119  
120 **Supplementary Fig 11. Uncropped original gels shown in the Supplementary Fig 5c and**  
121 **Supplementary Fig 6**

122  
123  
124

**Supplementary Table 1. miRs selectively induced by subclinical dose LPS**

| id                           | PBS        | LPS        | Fold Change | log2Fold Change |
|------------------------------|------------|------------|-------------|-----------------|
| <b><i>mmu-miR-24-3p</i></b>  | 5163.2669  | 57785.0508 | 11.19156766 | 3.4843402       |
| mmu-miR-3068-5p              | 19.061420  | 183.523741 | 9.628020362 | 3.2672391       |
| mmu-miR-146a-5p              | 6615.9765  | 55275.4873 | 8.35484932  | 3.0626138       |
| mmu-miR-1965                 | 0.7773613  | 6.05221449 | 7.78558712  | 2.9608058       |
| mmu-miR-1953                 | 0.9549579  | 5.23425630 | 5.481137857 | 2.4544754       |
| mmu-miR-450b-3p              | 3.4718013  | 17.9982757 | 5.184131734 | 2.3741023       |
| mmu-miR-449a-5p              | 2.1102558  | 9.17771225 | 4.349099244 | 2.1207166       |
| mmu-miR-152-3p               | 359.01571  | 964.823028 | 2.687411723 | 1.4262173       |
| mmu-miR-6236                 | 11.600608  | 30.2133288 | 2.604460776 | 1.3809847       |
| mmu-miR-29b-2-5p             | 16.226452  | 41.4310964 | 2.553305899 | 1.3523663       |
| mmu-miR-200a-3p              | 22.1733757 | 55.1966714 | 2.489321973 | 1.31575284      |
| mmu-miR-6240                 | 218.527628 | 471.464116 | 2.157457709 | 1.10933228      |
| mmu-miR-2137                 | 37.9225004 | 75.8060019 | 1.998971613 | 0.99925798      |
| mmu-miR-155-5p               | 186.703613 | 337.736411 | 1.808944158 | 0.85514787      |
| mmu-miR-188-5p               | 329.895138 | 594.127773 | 1.800959471 | 0.84876571      |
| <b><i>mmu-miR-29a-5p</i></b> | 112.545596 | 201.605426 | 1.79132221  | 0.84102486      |
| mmu-miR-5115                 | 251.576054 | 445.134329 | 1.769382744 | 0.82324615      |
| mmu-miR-194-5p               | 132.146298 | 230.562523 | 1.744752032 | 0.80302201      |

127  
128  
129  
130  
131

**Supplementary Table 2. Arbitrary Model Parameter Values**

| <b>Parameter</b>   | <b>Description</b>                              | <b>Value</b> |
|--------------------|-------------------------------------------------|--------------|
| $\gamma_X$         | Rate of <i>X</i> reaching its steady state      | 1            |
| $\gamma_Y$         | Rate of <i>Y</i> reaching its steady state      | 1            |
| $\gamma_{IRAKM}$   | Rate of <i>IRAK-M</i> reaching its steady state | 1            |
| $\omega_X$         | Basal inhibition of <i>X</i>                    | -1.4         |
| $\omega_{X,X}$     | <i>X</i> auto-activation                        | 6.4          |
| $\omega_{Y,X}$     | <i>X</i> inhibition by <i>Y</i>                 | -2           |
| $\omega_{LPS,X}$   | <i>X</i> activation by LPS                      | 1            |
| $\omega_{IRAKM,X}$ | <i>X</i> inhibition by <i>IRAK-M</i>            | -1           |
| $\omega_Y$         | Basal activation of <i>Y</i>                    | 0.2          |
| $\omega_{Y,Y}$     | <i>Y</i> auto-activation                        | 6.4          |
| $\omega_{X,Y}$     | <i>Y</i> inhibition by <i>X</i>                 | -2           |
| $\omega_{IRAKM}$   | Basal activation of <i>IRAK-M</i>               | 0.2          |
| $\omega_{X,IRAKM}$ | <i>IRAKM</i> inhibition by <i>X</i>             | -2           |
| <i>LPS</i>         | Level of LPS                                    | 0 ~ 1        |

132
